# Supplementary material for: The Effect of the Topmost Layer and the Type of Bone Morphogenetic Protein-2 Immobilization on the Mesenchymal Stem Cell Response
Source: MDPI journal article supplement (doi:10.3390/ijms23169287), 2022-08-18
Supplement: s1 [file s1]

## Supporting Information

### The Effect of the Topmost Layer and the Type of Bone Morphogenetic Protein-2 Immobilization on the Mesenchymal Stem Cell Response

Magdalena Wytrwal-Sarna, Małgorzata Sekuła-Stryjewska, Agata Pomorska, Ewa Ocioń, Katarzyna Gajos, Michał Sarna, Ewa Zuba-Surma, Andrzej Bernasik, Krzysztof Szczubiałka

#### 1. Multilayer preparation

Before the multilayers deposition, all substrates (silicon wafers, glass coverslips or quartz substrates) were cleaned by so-called “piranha” solution ( $\text{H}_2\text{SO}_5$ ) (i.e., a mixture of 30% solution of  $\text{H}_2\text{O}_2$  and concentrated  $\text{H}_2\text{SO}_4$  at 1:3 ratio). Because the substrates were negatively charged, the first deposited layer was polycation. After 5 mins in a sonic bath, substrates were washed by deionized water three times. Next, the polyanion solution was used and placed in a sonic bath. All steps were repeated to obtain the desired systems composed of 12- or 13-deposited layers, respectively as  $(\text{DR/CS})_6$  or  $(\text{DR/CS})_6\text{DR}$ . Subsequently, multilayer systems were stabilized using the photocrosslinking method (irradiation by UV lamp  $\lambda = 350$  nm for 3 mins). Photoreactions between functional groups are presented in Figure S1. The confirmation of photoreaction is the shifting of maximum absorption of DR from 380 nm to 290 nm (Figure S2).

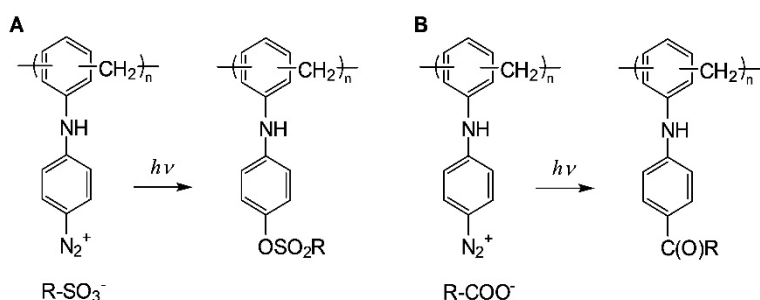

**Figure S1** Photocrosslinking reaction between diazonium groups of DR and carboxyl – A and sulfonic groups – B of chondroitin sulfate.

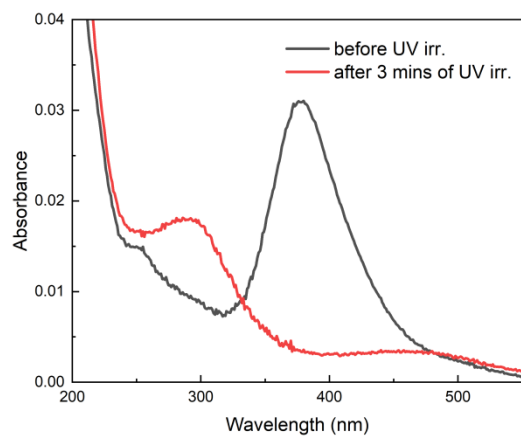

**Figure S2** UV-Vis spectra of (DR/CS)<sub>6</sub> non-photocrosslinked - before UV irradiation (black line) and photocrosslinked - after 3 minutes of UV irradiation (red line).

## 2. Real-time PCR

**Table S1** Primer list and primer sequences that were used in quantitative real-time PCR analysis of transcripts involved in osteogenic differentiation. F - forward sequence; R – reverse sequence.

| Primer name      | Sequence                |
|------------------|-------------------------|
| Human GAPDH -F   | CTTTTGCCTCGCCAG         |
| Human GAPDH -R   | TTGATGGCAACAATATCCAC    |
| Human ALPL -F    | CTATCCTGGCTCCGTGCTCC    |
| Human ALPL -R    | TTAACTGATGTTCCAATCCTGCG |
| Human COL10A1 -F | GCTAGTATCCTTGAACCTGG    |
| Human COL10A1 -R | CCTTTACTCTTTATGGTGTAGG  |
| Human OCN -F     | GACTGTGACGAGTTGGCTGA    |
| Human OCN -R     | CTGGAGAGGAGCAGAACTGG    |

### 3. AR-XPS measurements - atomic composition

**Table S2** Total XPS elemental analysis of photocrosslinked (DR/CS)<sub>6</sub> and (DR/CS)<sub>6</sub>DR samples measured with angled resolution.

| Angle<br>(°) | (DR/CS) <sub>6</sub> |     |      |     | (DR/CS) <sub>6</sub> DR |     |      |     |
|--------------|----------------------|-----|------|-----|-------------------------|-----|------|-----|
|              | C                    | N   | O    | S   | C                       | N   | O    | S   |
|              | % at.                |     |      |     | % at.                   |     |      |     |
| 15           | 70.4                 | 6.5 | 21.7 | 1.5 | 73.4                    | 7.4 | 17.9 | 1.3 |
| 25           | 68.8                 | 6.7 | 23.5 | 1.0 | 71.2                    | 7.1 | 20.2 | 1.5 |
| 35           | 66.7                 | 6.8 | 24.9 | 1.7 | 70.5                    | 7.5 | 21.2 | 0.9 |
| 45           | 65.8                 | 7.2 | 25.8 | 1.1 | 68.9                    | 7.3 | 22.2 | 1.7 |
| 55           | 64.4                 | 7.8 | 27.0 | 0.9 | 69.9                    | 7.7 | 21.9 | 0.5 |
| 75           | 63.4                 | 7.6 | 27.6 | 1.5 | 67.0                    | 8.1 | 23.9 | 1.1 |

#### 4. TOF-SIMS measurements

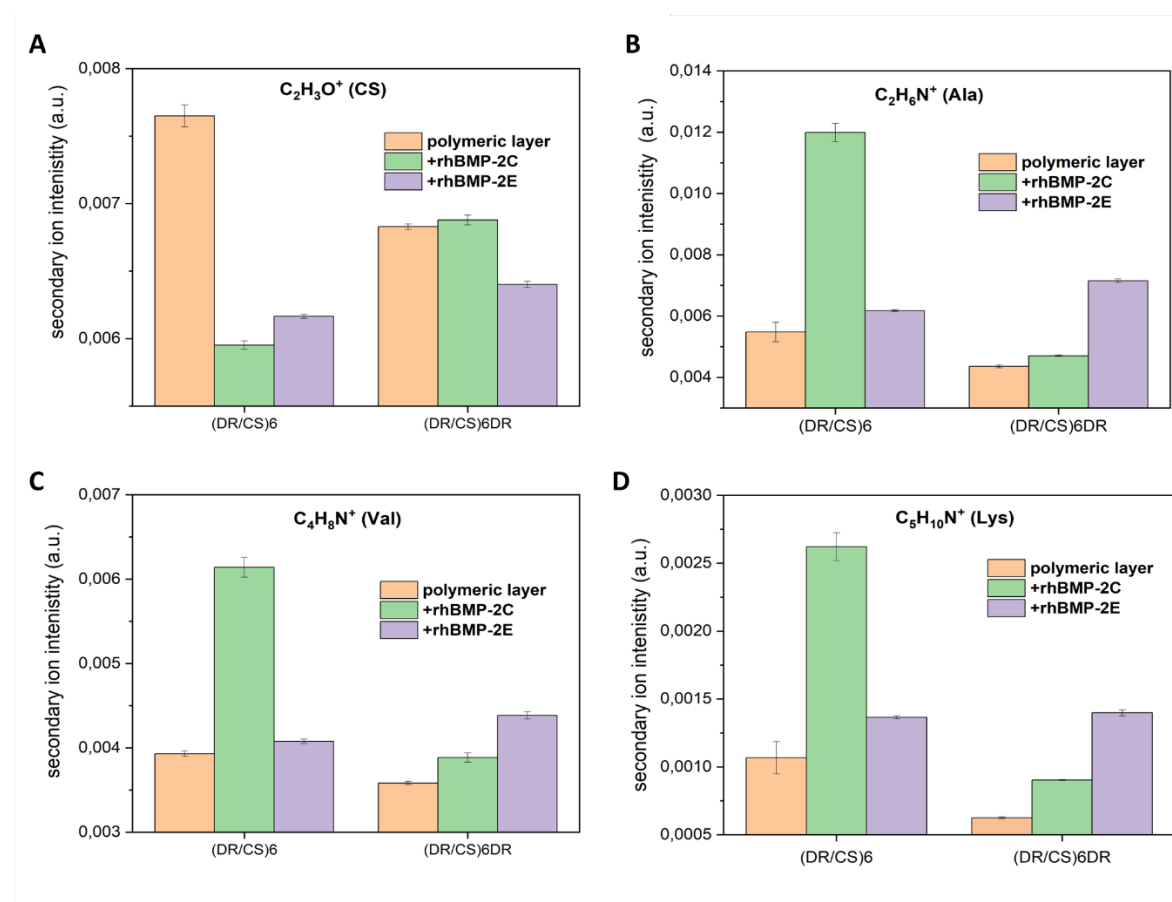

**Figure S3** Intensity of selected secondary ions typical for: A – acetyl group of CS; B – alanine; C – valine; D – lysine from rhBMP-2. Six analyzed layouts: bare (DR/CS)<sub>6</sub>, covalent binded protein - (DR/CS)<sub>6</sub>-rhBMP-2C; electrostatic binded protein (DR/CS)<sub>6</sub>-rhBMP-2E; bare (DR/CS)<sub>6</sub>DR, covalent binded protein - (DR/CS)<sub>6</sub>DR-rhBMP-2C; electrostatic binded protein (DR/CS)<sub>6</sub>DR-rhBMP-2E.
